# Supplementary material for: Unraveling the Genomic Landscape of Staphylococcus aureus in Hospital Settings of East Africa
Source: Research Square preprint supplement (doi:10.21203/rs.3.rs-6846109/v1), 2025-08-07
Supplement: Supplementary file 1 [file 15f039c26877ec21fe854999.xlsx]

## Sheet: Sheet1
GENE	RESISTANCE	PRODUCT	ACCESSION	COUNT
ant(2)-Ia	GENTAMICIN;KANAMYCIN;TOBRAMYCIN	aminoglycoside nucleotidyltransferase ANT(2)-Ia	NG_052432.1	1
ant(6)-Ia	STREPTOMYCIN	aminoglycoside nucleotidyltransferase ANT(6)-Ia	NG_050582.1	2
ant(9)-Ia	SPECTINOMYCIN	aminoglycoside nucleotidyltransferase ANT(9)-Ia	NG_047397.1	2
aph(2)-Ih	AMIKACIN;GENTAMICIN;KANAMYCIN;TOBRAMYCIN	aminoglycoside O-phosphotransferase APH(2)-Ih	NG_047408.1	113
aph(3)-Ib	STREPTOMYCIN	aminoglycoside O-phosphotransferase APH(3)-Ib	NG_056002.2	3
aph(6)-Id	STREPTOMYCIN	aminoglycoside O-phosphotransferase APH(6)-Id	NG_047464.1	5
blaADC-152	CEPHALOSPORIN	class C beta-lactamase ADC-152	NG_054691.1	1
blaI_of_Z	BETA-LACTAM	penicillinase repressor BlaI	NG_047499.1	477
blaPC1	BETA-LACTAM	BlaZ family penicillin-hydrolyzing class A beta-lactamase PC1	NG_052065.1	62
blaR1	BETA-LACTAM	beta-lactam sensor/signal transducer BlaR1	NG_047536.1	4
blaR1	BETA-LACTAM	beta-lactam sensor/signal transducer BlaR1	NG_047539.1	228
blaR1	BETA-LACTAM	beta-lactam sensor/signal transducer BlaR1	NG_051774.1	212
blaR1-2	BETA-LACTAM	beta-lactam sensor/signal transducer BlaR1	NG_047537.1	2
blaTEM-1	BETA-LACTAM	class A broad-spectrum beta-lactamase TEM-1	NG_050145.1	3
blaTEM-116	BETA-LACTAM	class A broad-spectrum beta-lactamase TEM-116	NG_050162.1	4
blaZ	BETA-LACTAM	penicillin-hydrolyzing class A beta-lactamase BlaZ	NG_047532.1	3
blaZ	BETA-LACTAM	penicillin-hydrolyzing class A beta-lactamase BlaZ	NG_047533.1	4
blaZ	BETA-LACTAM	penicillin-hydrolyzing class A beta-lactamase BlaZ	NG_047534.1	227
blaZ	BETA-LACTAM	penicillin-hydrolyzing class A beta-lactamase BlaZ	NG_055994.1	1
blaZ	BETA-LACTAM	penicillin-hydrolyzing class A beta-lactamase BlaZ	NG_055999.1	174
cat-TC	CHLORAMPHENICOL	type A-9 chloramphenicol O-acetyltransferase Cat-TC	NG_047562.1	1
cat86	CHLORAMPHENICOL	type A-6 chloramphenicol O-acetyltransferase Cat86	NG_047563.1	1
catA4	CHLORAMPHENICOL	type A-4 chloramphenicol O-acetyltransferase	NG_047569.1	17
catA7	CHLORAMPHENICOL	type A-7 chloramphenicol O-acetyltransferase	NG_047566.1	4
catA8	CHLORAMPHENICOL	type A-8 chloramphenicol O-acetyltransferase	NG_047574.1	1
dfrA14	TRIMETHOPRIM	trimethoprim-resistant dihydrofolate reductase DfrA14	NG_047699.2	1
dfrA7	TRIMETHOPRIM	trimethoprim-resistant dihydrofolate reductase DfrA7	NG_047737.1	2
dfrC	TRIMETHOPRIM	trimethoprim-resistant dihydrofolate reductase DfrC	NG_047752.1	119
dfrE	TRIMETHOPRIM	trimethoprim-resistant dihydrofolate reductase DfrE	NG_055770.1	19
dfrG	TRIMETHOPRIM	trimethoprim-resistant dihydrofolate reductase DfrG	NG_047756.1	346
eat(A)	PLEUROMUTILIN	ABC-F type ribosomal protection protein Eat(A)	NG_047762.1	3
erm(A)	MACROLIDE	23S rRNA (adenine(2058)-N(6))-methyltransferase Erm(A)	NG_047789.1	2
erm(B)	MACROLIDE	23S rRNA (adenine(2058)-N(6))-methyltransferase Erm(B)	NG_047794.1	2
erm(B)	MACROLIDE	23S rRNA (adenine(2058)-N(6))-methyltransferase Erm(B)	NG_047804.1	1
erm(C)	MACROLIDE	23S rRNA (adenine(2058)-N(6))-methyltransferase Erm(C)	NG_047806.1	123
erm(C)	MACROLIDE	23S rRNA (adenine(2058)-N(6))-methyltransferase Erm(C)	NG_047809.1	5
floR	CHLORAMPHENICOL;FLORFENICOL	chloramphenicol/florfenicol efflux MFS transporter FloR	NG_047869.1	3
fosA5	FOSFOMYCIN	fosfomycin resistance glutathione transferase FosA5	NG_050409.1	1
fosB-251804940	FOSFOMYCIN	FosB family fosfomycin resistance bacillithiol transferase	NG_047888.1	14
fosB-251804940	FOSFOMYCIN	FosB family fosfomycin resistance bacillithiol transferase	NG_047889.1	10
fosB-Saur	FOSFOMYCIN	FosB1/FosB3 family fosfomycin resistance bacillithiol transferase	NG_065844.1	218
fosD	FOSFOMYCIN	fosfomycin resistance bacillithiol transferase FosD	NG_047892.1	3
fusB	FUSIDIC_ACID	fusidic acid resistance EF-G-binding protein FusB	NG_047900.1	1
lnu(A)	LINCOSAMIDE	lincosamide nucleotidyltransferase Lnu(A)	NG_047916.1	1
lnu(A)	LINCOSAMIDE	lincosamide nucleotidyltransferase Lnu(A)	NG_047918.1	3
lsa(A)	LINCOSAMIDE;STREPTOGRAMIN	ABC-F type ribosomal protection protein Lsa(A)	NG_047930.1	8
lsa(A)	LINCOSAMIDE;STREPTOGRAMIN	ABC-F type ribosomal protection protein Lsa(A)	NG_047931.1	3
lsa(A)	LINCOSAMIDE;STREPTOGRAMIN	ABC-F type ribosomal protection protein Lsa(A)	NG_047932.1	1
lsa(A)	LINCOSAMIDE;STREPTOGRAMIN	ABC-F type ribosomal protection protein Lsa(A)	NG_055640.1	4
mecA	METHICILLIN	PBP2a family beta-lactam-resistant peptidoglycan transpeptidase MecA	NG_047937.1	11
mecA	METHICILLIN	PBP2a family beta-lactam-resistant peptidoglycan transpeptidase MecA	NG_047938.1	1
mecA	METHICILLIN	PBP2a family beta-lactam-resistant peptidoglycan transpeptidase MecA	NG_047939.1	106
mecA	METHICILLIN	PBP2a family beta-lactam-resistant peptidoglycan transpeptidase MecA	NG_047940.1	3
mecA1	METHICILLIN	PBP2a family beta-lactam-resistant peptidoglycan transpeptidase MecA1	NG_047949.1	6
mecA1	METHICILLIN	PBP2a family beta-lactam-resistant peptidoglycan transpeptidase MecA1	NG_047950.1	4
mecI_of_mecA	METHICILLIN	mecA-type methicillin resistance repressor MecI	NG_055650.1	6
mecR1	METHICILLIN	beta-lactam sensor/signal transducer MecR1	NG_051163.1	6
mef(C)	MACROLIDE	macrolide efflux MFS transporter Mef(C)	NG_047979.1	2
msr(A)	MACROLIDE	ABC-F type ribosomal protection protein Msr(A)	NG_048001.1	6
msr(A)	MACROLIDE	ABC-F type ribosomal protection protein Msr(A)	NG_055998.1	3
msr(C)	MACROLIDE	ABC-F type ribosomal protection protein Msr(C)	NG_048004.1	1
mupA	MUPIROCIN	mupirocin-resistant isoleucine--tRNA ligase MupA	NG_048008.1	2
sal(A)	LINCOSAMIDE;STREPTOGRAMIN	ABC-F type ribosomal protection protein Sal(A)	NG_048067.1	10
sat4	STREPTOTHRICIN	streptothricin N-acetyltransferase Sat4	NG_048072.1	5
str	STREPTOMYCIN	streptomycin adenylyltransferase Str	NG_048079.1	6
str	STREPTOMYCIN	streptomycin adenylyltransferase Str	NG_048080.1	13
sul2	SULFONAMIDE	sulfonamide-resistant dihydropteroate synthase Sul2	NG_051852.1	5
tet(38)	TETRACYCLINE	tetracycline efflux MFS transporter Tet(38)	NG_048133.1	11
tet(38)	TETRACYCLINE	tetracycline efflux MFS transporter Tet(38)	NG_048134.1	195
tet(38)	TETRACYCLINE	tetracycline efflux MFS transporter Tet(38)	NG_048135.1	2
tet(38)	TETRACYCLINE	tetracycline efflux MFS transporter Tet(38)	NG_048136.1	162
tet(38)	TETRACYCLINE	tetracycline efflux MFS transporter Tet(38)	NG_055983.1	41
tet(38)	TETRACYCLINE	tetracycline efflux MFS transporter Tet(38)	NG_055984.1	55
tet(39)	TETRACYCLINE	tetracycline efflux MFS transporter Tet(39)	NG_048137.1	1
tet(A)	TETRACYCLINE	tetracycline efflux MFS transporter Tet(A)	NG_048156.1	3
tet(J)	TETRACYCLINE	tetracycline efflux MFS transporter Tet(J)	NG_048199.1	15
tet(K)	TETRACYCLINE	tetracycline efflux MFS transporter Tet(K)	NG_048200.1	142
tet(L)	TETRACYCLINE	tetracycline efflux MFS transporter Tet(L)	NG_048203.1	7
tet(M)	TETRACYCLINE	tetracycline resistance ribosomal protection protein Tet(M)	NG_048213.1	3
tet(M)	TETRACYCLINE	tetracycline resistance ribosomal protection protein Tet(M)	NG_048223.1	2
tet(M)	TETRACYCLINE	tetracycline resistance ribosomal protection protein Tet(M)	NG_048233.1	9
tet(M)	TETRACYCLINE	tetracycline resistance ribosomal protection protein Tet(M)	NG_048234.1	1
tet(M)	TETRACYCLINE	tetracycline resistance ribosomal protection protein Tet(M)	NG_048247.1	2
tet(M)	TETRACYCLINE	tetracycline resistance ribosomal protection protein Tet(M)	NG_048250.1	3
tet(M)	TETRACYCLINE	tetracycline resistance ribosomal protection protein Tet(M)	NG_048252.1	2
vanC1	VANCOMYCIN	D-alanine--D-serine ligase VanC1	NG_048343.1	1
vanR-A	VANCOMYCIN	VanA-type vancomycin resistance DNA-binding response regulator VanR	NG_048415.1	1
vanR-C	VANCOMYCIN	VanC-type vancomycin resistance DNA-binding response regulator VanR	NG_048404.1	1
vanR-O	VANCOMYCIN	VanO-type vancomycin resistance response regulator transcription factor VanR	NG_048424.1	1
vanS-C	VANCOMYCIN	VanC-type vancomycin resistance histidine kinase VanS	NG_048430.1	1
vanT-C	VANCOMYCIN	membrane-bound serine racemase VanT-C	NG_048454.1	1
vanXY-C	VANCOMYCIN	D-Ala-D-Ala dipeptidase/D-Ala-D-Ala carboxypeptidase VanXY-C	NG_048503.1	1
vanZ-F	VANCOMYCIN	glycopeptide resistance protein VanZ-F	NG_048535.1	1
vga(A)	LINCOSAMIDE	ABC-F type ribosomal protection protein Vga(A)	NG_048553.1	2
