# Supplementary material for: Unraveling the Genomic Landscape of Staphylococcus aureus in Hospital Settings of East Africa
Source: Research Square preprint supplement (doi:10.21203/rs.3.rs-6846109/v1), 2025-08-07

Primary cluster 1; grid spacing: 1.0% ANI

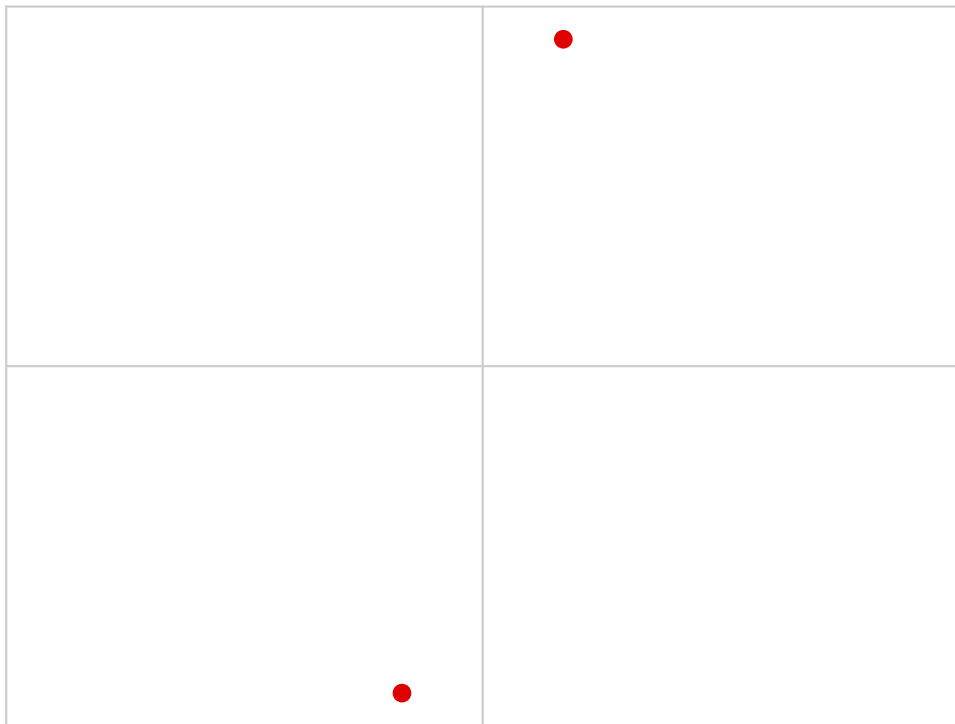

 1\_1

Primary cluster 2; grid spacing: 1.0% ANI

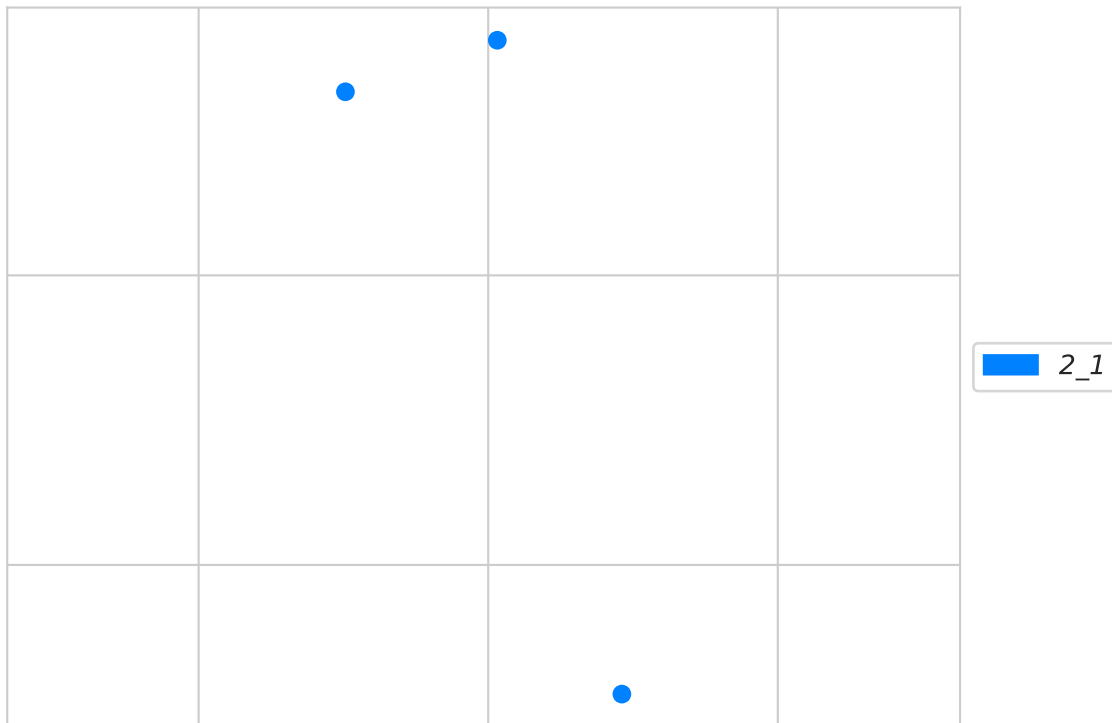

Primary cluster 3; grid spacing: 1.0% ANI

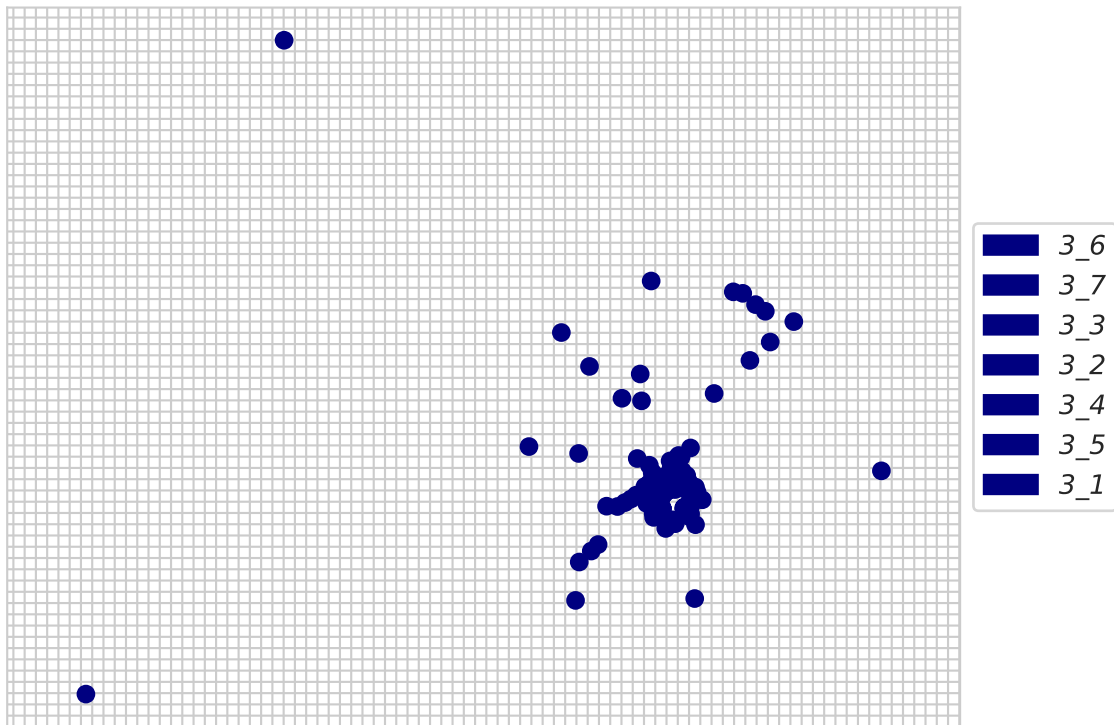

Primary cluster 4; grid spacing: 1.0% ANI

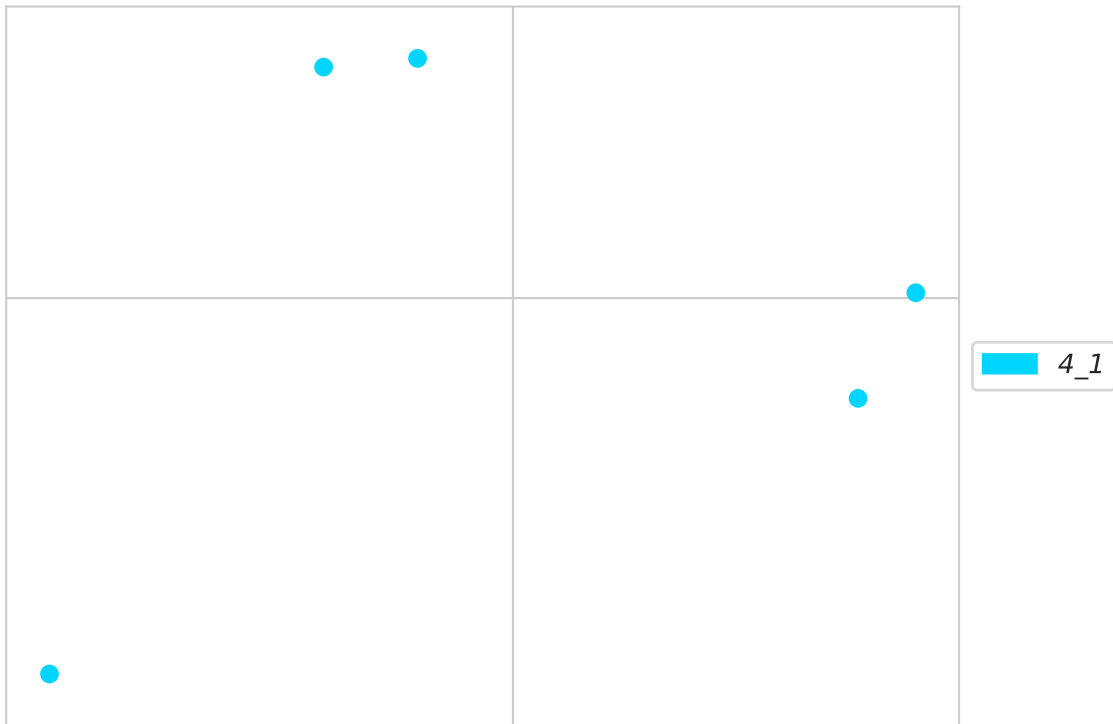

Primary cluster 5; grid spacing: 1.0% ANI

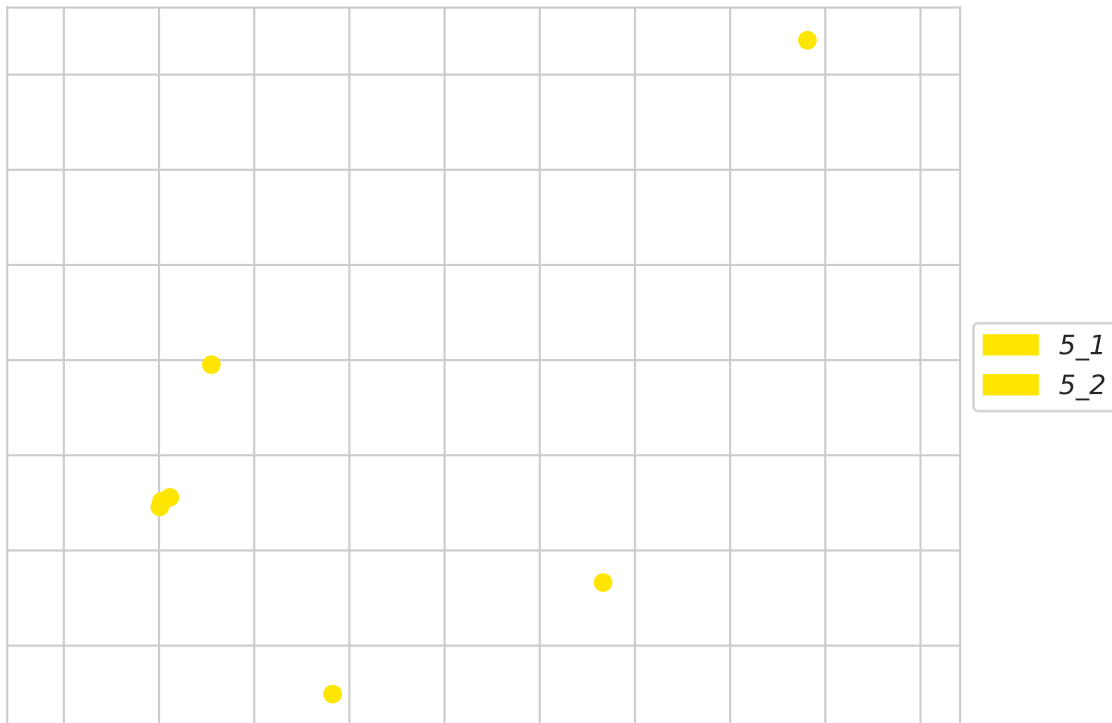

Supplement: Supplementary file 1 [file 9178114d257415c8043635bb.pdf]
