# Supplementary material for: Unraveling the Genomic Landscape of Staphylococcus aureus in Hospital Settings of East Africa
Source: Research Square preprint supplement (doi:10.21203/rs.3.rs-6846109/v1), 2025-08-07
Supplement: Supplementary file 2 [file 1f6c169ccd886f42223c3250.xlsx]

## Sheet: Sheet1
sample_id	spa_type	country
ERR12511686	t1476	Tanzania
ERR12511687	t4333	Tanzania
ERR12511688	t346	Tanzania
ERR12511690	t091	Tanzania
ERR12511691	t355	Tanzania
ERR12511692	t355	Tanzania
ERR12511693	t690	Tanzania
ERR12511694	t1299	Tanzania
ERR12511695	t355	Tanzania
ERR12511696	t10599	Tanzania
ERR12511697	t355	Tanzania
ERR12511698	t355	Tanzania
ERR12511699	t346	Tanzania
ERR12511700	t1476	Tanzania
ERR12511701	t1476	Tanzania
ERR12511702	t355	Tanzania
ERR12511703	t355	Tanzania
ERR12511704	t1476	Tanzania
ERR12511705	t1476	Tanzania
ERR12511706	t1476	Tanzania
ERR12511707	t6940	Tanzania
ERR12511708	t1849	Tanzania
ERR12511709	t355	Tanzania
ERR12511710	t355	Tanzania
ERR12511711	t296	Tanzania
ERR12511712	t1476	Tanzania
ERR12511714	t355	Tanzania
ERR12511715	t355	Tanzania
ERR12511716	t084	Tanzania
ERR12511717	t104	Tanzania
ERR12511718	t355	Tanzania
ERR12511719	t355	Tanzania
ERR12511720	t1476	Tanzania
ERR12511721	t084	Tanzania
ERR12511722	t4499	Tanzania
ERR12511723	t1476	Tanzania
ERR12511724	t1476	Tanzania
ERR12511725	t12274	Tanzania
ERR12511726	t1476	Tanzania
ERR12511727	t1476	Tanzania
ERR12511728	t355	Tanzania
ERR12511729	t355	Tanzania
ERR12511730	t355	Tanzania
ERR12511731	t1476	Tanzania
ERR12511732	t355	Tanzania
ERR12511733	t1476	Tanzania
ERR12511734	t1476	Tanzania
ERR12511735	t6940	Tanzania
ERR12511736	t1476	Tanzania
ERR12511737	t1931	Tanzania
ERR12511738	t1476	Tanzania
ERR12511739	t355	Tanzania
ERR12511740	t1476	Tanzania
ERR12511741	t1476	Tanzania
ERR12511742	t091	Tanzania
ERR12511743	t1476	Tanzania
ERR12511744	t1476	Tanzania
ERR12511745	t1476	Tanzania
ERR12511746	t1476	Tanzania
ERR12511747	t091	Tanzania
ERR12511748	t1476	Tanzania
ERR12511749	t355	Tanzania
ERR12511750	t1476	Tanzania
ERR12511751	t1476	Tanzania
ERR12511752	t1476	Tanzania
ERR12511753	t355	Tanzania
ERR12511754	t1476	Tanzania
ERR12511755	t1476	Tanzania
ERR12511756	t13527	Tanzania
ERR12511757	t1476	Tanzania
ERR12511758	t1476	Tanzania
ERR12511759	t17400	Tanzania
ERR12511760	t1476	Tanzania
ERR12511761	t1476	Tanzania
ERR12511762	t355	Tanzania
ERR12511763	t6509	Tanzania
ERR12511764	t1346	Tanzania
ERR12511765	t355	Tanzania
ERR12511766	t15643	Tanzania
ERR12511767	t1476	Tanzania
ERR12511768	t1476	Tanzania
ERR12511769	t355	Tanzania
ERR12511770	t645	Tanzania
ERR12511771	t5917	Tanzania
ERR12511772	t1476	Tanzania
ERR12511773	t355	Tanzania
ERR12511774	t4499	Tanzania
ERR12511775	t1991	Tanzania
ERR12511776	t1476	Tanzania
ERR12511777	t355	Tanzania
ERR12511778	t1476	Tanzania
ERR12511779	t1476	Tanzania
ERR12511780	t4198	Tanzania
ERR12511781	t355	Tanzania
ERR12511782	t1476	Tanzania
ERR12511783	t355	Tanzania
ERR12511784	t355	Tanzania
ERR12511785	t1476	Tanzania
ERR12511786	t1476	Tanzania
ERR12511787	t1476	Tanzania
ERR12511788	t1476	Tanzania
ERR12511789	t091	Tanzania
ERR12511790	t1476	Tanzania
ERR12511791	t355	Tanzania
ERR12511792	t1476	Tanzania
ERR12511793	t1476	Tanzania
ERR12511794	t091	Tanzania
ERR12511795	t355	Tanzania
ERR12511796	t1476	Tanzania
ERR12511797	t1476	Tanzania
ERR12511798	t355	Tanzania
ERR12511800	t491	Tanzania
ERR12511801	t934	Tanzania
ERR12511802	t355	Tanzania
ERR12511803	t1476	Tanzania
ERR12511804	t355	Tanzania
ERR12511805	t355	Tanzania
ERR12511806	t311	Tanzania
ERR12511807	t1476	Tanzania
ERR12511808	t1476	Tanzania
ERR12511809	t1476	Tanzania
ERR12511810	t159	Tanzania
ERR12511811	t355	Tanzania
ERR12511812	t355	Tanzania
ERR12511813	t1476	Tanzania
ERR12511814	t4499	Tanzania
ERR12511815	t4333	Tanzania
ERR12511816	t4499	Tanzania
ERR12511817	t318	Tanzania
ERR12511818	t498	Tanzania
ERR12511819	t774	Tanzania
ERR12511820	t4333	Tanzania
ERR12511821	t1476	Tanzania
ERR12511822	t4333	Tanzania
ERR12511823	t4333	Tanzania
ERR12511824	t304	Tanzania
ERR12511825	t498	Tanzania
ERR12511826	t498	Tanzania
ERR12511827	t223	Tanzania
ERR12511828	t645	Tanzania
ERR12511829	t17400	Tanzania
ERR12511830	t498	Tanzania
ERR12511831	t4333	Tanzania
ERR12511832	t324	Tanzania
ERR12511833	t1172	Tanzania
ERR12511834	t4333	Tanzania
ERR12511835	t4333	Tanzania
ERR12511836	t498	Tanzania
ERR12511837	t4333	Tanzania
ERR12511838	t498	Tanzania
ERR12511839	t903	Tanzania
ERR12511840	t1476	Tanzania
ERR12511841	t17095	Tanzania
ERR12511843	t084	Tanzania
ERR12511844	t4333	Tanzania
ERR12511845	t1476	Tanzania
ERR12511846	t498	Tanzania
ERR12511847	t4333	Tanzania
ERR12511848	t4499	Tanzania
ERR12511849	t2467	Tanzania
ERR12511850	t4499	Tanzania
ERR12916291	t064	Tanzania
ERR12916292	t1476	Tanzania
ERR12916293	t062	Tanzania
ERR12916294	t355	Tanzania
ERR12916295	t1476	Tanzania
ERR12916296	t355	Tanzania
ERR12916297	t701	Tanzania
ERR12916298	t1476	Tanzania
ERR12916299	t1476	Tanzania
ERR12916300	t084	Tanzania
ERR1764887	t6755	Kenya
ERR1764889	t1504	Kenya
ERR1764890	t1504	Kenya
ERR1764892	t1504	Kenya
ERR1764893	t131	Kenya
ERR1764895	t1504	Kenya
ERR1764896	t5047	Kenya
ERR1764897	t5047	Kenya
ERR1764901	t355	Kenya
ERR1764903	t3243	Kenya
ERR1764904	t002	Kenya
ERR1764906	t7196	Kenya
ERR1764907	t7196	Kenya
ERR1764908	t355	Kenya
ERR1764909	t355	Kenya
ERR1764910	t355	Kenya
ERR1764911	t037	Kenya
ERR1764912	t355	Kenya
ERR1764915	t13194	Kenya
ERR1764917	t355	Kenya
ERR1764919	t3243	Kenya
ERR1764920	t957	Kenya
ERR1764921	t13194	Kenya
ERR1764922	t015	Kenya
ERR1764923	t064	Kenya
ERR1764924	t064	Kenya
ERR1764925	t064	Kenya
ERR1764926	t13194	Kenya
ERR1764927	t474	Kenya
ERR1764928	t355	Kenya
ERR1764929	t3243	Kenya
ERR1764930	t189	Kenya
ERR1764931	t355	Kenya
ERR1764932	t13194	Kenya
ERR1764933	t064	Kenya
ERR1764934	t064	Kenya
ERR1764937	t186	Kenya
ERR1764939	t131	Kenya
ERR1764940	t355	Kenya
ERR1764941	t355	Kenya
ERR1764942	t064	Kenya
ERR1764943	t13194	Kenya
ERR1764944	t064	Kenya
ERR1764945	t645	Kenya
ERR1764946	t064	Kenya
ERR1764947	t13194	Kenya
ERR1764948	t064	Kenya
ERR1764949	t355	Kenya
ERR1764950	t5475	Kenya
ERR1764951	t3092	Kenya
ERR1764952	t4523	Kenya
ERR1764953	t1504	Kenya
ERR1764954	t094	Kenya
ERR1764955	t131	Kenya
ERR1764956	t355	Kenya
ERR1764957	t064	Kenya
ERR1764958	t355	Kenya
ERR1764959	t4523	Kenya
ERR1764960	t13194	Kenya
ERR1764961	t6759	Kenya
ERR1764962	t131	Kenya
ERR1764963	t474	Kenya
ERR1764964	t340	Kenya
ERR1764965	t1504	Kenya
ERR1764967	t064	Kenya
ERR1764968	t148	Kenya
ERR1764969	t3202	Kenya
ERR1764970	t2421	Kenya
ERR1764971	t064	Kenya
ERR1764972	t015	Kenya
ERR1764973	t355	Kenya
ERR1764974	t355	Kenya
ERR1764975	t064	Kenya
ERR1764976	t355	Kenya
ERR1764977	t1828	Kenya
ERR1764978	t941	Kenya
ERR1764979	t355	Kenya
ERR1764980	t355	Kenya
ERR1764981	t1299	Kenya
ERR1764982	t355	Kenya
ERR1764984	t355	Kenya
ERR1764985	t189	Kenya
ERR1764986	t044	Kenya
ERR1764987	t355	Kenya
ERR1764988	t127	Kenya
ERR1764989	t064	Kenya
ERR1764990	t127	Kenya
ERR1764991	t355	Kenya
ERR1764992	t498	Kenya
ERR1764993	t190	Kenya
ERR1764994	t355	Kenya
ERR1764995	t355	Kenya
ERR1764996	t4353	Kenya
ERR1764997	t451	Kenya
ERR1764998	t355	Kenya
ERR1764999	t355	Kenya
ERR1765000	t13194	Kenya
ERR1765001	t190	Kenya
ERR1765002	t355	Kenya
ERR1765004	t094	Kenya
ERR1765005	t094	Kenya
ERR1765006	t13194	Kenya
ERR1765007	t1504	Kenya
ERR1765008	t6208	Kenya
ERR1765009	t3341	Kenya
ERR1765010	t002	Kenya
ERR1765012	t6759	Kenya
ERR1765013	t355	Kenya
ERR1765014	t064	Kenya
ERR1765015	t355	Kenya
ERR1765016	t3662	Kenya
ERR1765017	t355	Kenya
ERR1765018	t064	Kenya
ERR1765019	t355	Kenya
ERR1765020	t355	Kenya
ERR1765021	t6759	Kenya
ERR1765022	t355	Kenya
ERR1765023	t355	Kenya
ERR1765024	t304	Kenya
ERR1765025	t064	Kenya
ERR1765026	t304	Kenya
ERR1765027	t729	Kenya
ERR1765028	t355	Kenya
ERR1765029	t3243	Kenya
ERR1765030	t002	Kenya
ERR1765031	t690	Kenya
ERR1765032	t064	Kenya
ERR1765033	t3243	Kenya
ERR1765034	t355	Kenya
ERR1765035	t4353	Kenya
ERR1765036	t064	Kenya
ERR1765037	t355	Kenya
ERR1765038	t1504	Kenya
ERR1765039	t355	Kenya
ERR1765040	t4195	Kenya
ERR1765041	t355	Kenya
ERR1765042	t355	Kenya
ERR1765043	t355	Kenya
ERR1765044	t002	Kenya
ERR1765045	t1839	Kenya
ERR1765046	t9188	Kenya
ERR1765047	t355	Kenya
ERR1765048	t729	Kenya
ERR1765049	t127	Kenya
ERR1765050	t127	Kenya
ERR1765051	t340	Kenya
ERR1765052	t528	Kenya
ERR1791869	t6755	Kenya
ERR1791870	t355	Kenya
ERR1791871	t3662	Kenya
ERR1791872	t340	Kenya
ERR1791873	t1621	Kenya
ERR1791874	t355	Kenya
ERR1791875	t355	Kenya
ERR1791876	t355	Kenya
ERR1791878	t355	Kenya
ERR1791879	t064	Kenya
ERR1791880	t355	Kenya
ERR1791881	t690	Kenya
ERR1791882	t355	Kenya
ERR3150909	t701	Kenya
ERR3150910	t701	Kenya
ERR3150911	t1176	Kenya
ERR3150912	t3772	Kenya
ERR3150915	t693	Kenya
ERR3150918	t693	Kenya
ERR3150919	t355	Kenya
ERR3150920	t5355	Kenya
ERR3150922	t223	Kenya
ERR3150924	t701	Kenya
ERR3150925	t091	Kenya
ERR3150927	t131	Kenya
ERR3150928	t701	Kenya
ERR3150931	t3772	Kenya
ERR3150932	t3772	Kenya
ERR3150934	t1943	Kenya
ERR3150935	t1849	Kenya
ERR3150936	t13194	Kenya
ERR3150937	t355	Kenya
ERR3150938	t5355	Kenya
ERR3150939	t223	Kenya
ERR3150940	t084	Kenya
ERR3150941	t4904	Kenya
ERR3150942	t996	Kenya
ERR3150944	t189	Kenya
ERR3150945	t1176	Kenya
ERR3150946	t084	Kenya
ERR3150947	t355	Kenya
ERR3150948	t189	Kenya
ERR3150950	t701	Kenya
ERR3150951	t355	Kenya
ERR3150952	t011	Kenya
ERR3150953	t267	Kenya
ERR3150954	t355	Kenya
ERR3150955	t355	Kenya
ERR3150956	t223	Kenya
ERR3150957	t14228	Kenya
ERR3150960	t189	Kenya
ERR3150961	t2453	Kenya
ERR3150963	t189	Kenya
ERR3150964	t223	Kenya
ERR3150967	t13194	Kenya
ERR3150968	t8934	Kenya
ERR3150970	t084	Kenya
ERR3150971	t091	Kenya
ERR3150972	t355	Kenya
ERR3150973	t1176	Kenya
ERR3150974	t189	Kenya
ERR3150976	t223	Kenya
ERR3150977	t2453	Kenya
ERR3150978	t355	Kenya
ERR3150979	t808	Kenya
ERR3150980	t189	Kenya
ERR3150981	t189	Kenya
ERR3150982	t605	Kenya
ERR3150986	t189	Kenya
ERR3150989	t189	Kenya
ERR3150990	t223	Kenya
ERR3150991	t1476	Kenya
ERR3150992	t091	Kenya
ERR3150993	t189	Kenya
ERR3150994	t4802	Kenya
ERR3150995	t189	Kenya
ERR3150997	t355	Kenya
ERR3150998	t1176	Kenya
ERR3150999	t1476	Kenya
ERR3151000	t223	Kenya
ERR3151001	t223	Kenya
ERR4692235	t1476	Uganda
ERR4692236	t355	Uganda
ERR4692237	t355	Uganda
ERR4692239	t355	Uganda
ERR4692240	t021	Uganda
ERR4692241	t355	Uganda
ERR4692242	t1774	Uganda
ERR4692243	t10274	Uganda
ERR4692245	t1096	Uganda
ERR4692246	t1096	Uganda
ERR4692247	t10499	Uganda
ERR4692248	t355	Uganda
ERR4692249	t355	Uganda
ERR4692250	t355	Uganda
ERR4692251	t2554	Uganda
ERR4692253	t355	Uganda
ERR4692254	t355	Uganda
ERR4692255	t2771	Uganda
ERR4692256	t355	Uganda
ERR4692257	t9231	Uganda
ERR4692258	t127	Uganda
ERR4692259	t037	Uganda
ERR4692260	t355	Uganda
ERR4692261	t127	Uganda
ERR4692262	t355	Uganda
ERR4692263	t1476	Uganda
ERR4692264	t355	Uganda
ERR4692265	t645	Uganda
ERR4692266	t355	Uganda
ERR4692267	t355	Uganda
ERR4692268	t355	Uganda
ERR4692269	t1476	Uganda
ERR4692270	t355	Uganda
ERR4692271	t355	Uganda
ERR4692272	t355	Uganda
ERR4692273	t127	Uganda
ERR4692274	t9231	Uganda
ERR4692275	t2554	Uganda
ERR4692276	t311	Uganda
