# Supplementary material for: Unraveling the Genomic Landscape of Staphylococcus aureus in Hospital Settings of East Africa
Source: Research Square preprint supplement (doi:10.21203/rs.3.rs-6846109/v1), 2025-08-07
Supplement: Supplementary file 3 [file ea01f03a1ca5d4fab8b3c39d.xlsx]

## Sheet: Sheet1
GENE	PRODUCT	ACCESSION
EF0485	(EF0485) aggregation substance [AS (VF0352)] [Enterococcus faecalis V583]	NP_814266
EF0818	(EF0818) polysaccharide lyase family 8 [Hyaluronidase (VF0359)] [Enterococcus faecalis V583]	NP_814561
EF3023	(EF3023) polysaccharide lyase family 8 [Hyaluronidase (VF0359)] [Enterococcus faecalis V583]	NP_816637
ace	(ace) collagen adhesin protein [Ace (VF0355)] [Enterococcus faecalis V583]	NP_814829
acm	(acm) collagen adhesin precursor Acm [Acm (VF0419)] [Enterococcus faecium str. TX2555]	AAN12397
adsA	(adsA) Adenosine synthase A [AdsA (VF0422)] [Staphylococus aureus subsp. aureus MW2]	NP_644838
astA	(astA) heat-stable enterotoxin 1 [EAST1 (VF0216)] [Escherichia coli O44:H18 042]	BAA94855
aur	(aur) zinc metalloproteinase aureolysin [Aureolysin (VF0024)] [Staphylococus aureus subsp. aureus MW2]	NP_647375
bopD	(bopD) sugar-binding transcriptional regulator LacI family [BopD (VF0362)] [Enterococcus faecalis V583]	NP_814691
cap8A	(cap8A) capsular polysaccharide synthesis enzyme [Capsule (VF0003)] [Staphylococus aureus subsp. aureus MW2]	NP_644939
cap8B	(cap8B) capsular polysaccharide synthesis enzyme Cap8B [Capsule (VF0003)] [Staphylococus aureus subsp. aureus MW2]	NP_644940
cap8C	(cap8C) capsular polysaccharide synthesis enzyme Cap8C [Capsule (VF0003)] [Staphylococus aureus subsp. aureus MW2]	NP_644941
cap8D	(cap8D) capsular polysaccharide synthesis enzyme Cap8D [Capsule (VF0003)] [Staphylococus aureus subsp. aureus MW2]	NP_644942
cap8E	(cap8E) capsular polysaccharide synthesis enzyme Cap8E [Capsule (VF0003)] [Staphylococus aureus subsp. aureus MW2]	NP_644943
cap8F	(cap8F) capsular polysaccharide synthesis enzyme Cap8F [Capsule (VF0003)] [Staphylococus aureus subsp. aureus MW2]	NP_644944
cap8G	(cap8G) capsular polysaccharide synthesis enzyme Cap8G [Capsule (VF0003)] [Staphylococus aureus subsp. aureus MW2]	NP_644945
cap8H	(cap8H) capsular polysaccharide synthesis enzyme Cap8H [Capsule (VF0003)] [Staphylococus aureus subsp. aureus MW2]	NP_644946
cap8I	(cap8I) capsular polysaccharide synthesis enzyme Cap8I [Capsule (VF0003)] [Staphylococus aureus subsp. aureus MW2]	NP_644947
cap8J	(cap8J) capsular polysaccharide synthesis enzyme Cap8J [Capsule (VF0003)] [Staphylococus aureus subsp. aureus MW2]	NP_644948
cap8K	(cap8K) capsular polysaccharide synthesis enzyme Cap8K [Capsule (VF0003)] [Staphylococus aureus subsp. aureus MW2]	NP_644949
cap8L	(cap8L) capsular polysaccharide synthesis enzyme Cap8L [Capsule (VF0003)] [Staphylococus aureus subsp. aureus MW2]	NP_644950
cap8M	(cap8M) capsular polysaccharide synthesis enzyme Cap8M [Capsule (VF0003)] [Staphylococus aureus subsp. aureus MW2]	NP_644951
cap8N	(cap8N) capsular polysaccharide synthesis enzyme Cap8N [Capsule (VF0003)] [Staphylococus aureus subsp. aureus MW2]	NP_644952
cap8O	(cap8O) capsular polysaccharide synthesis enzyme Cap8O [Capsule (VF0003)] [Staphylococus aureus subsp. aureus MW2]	NP_644953
cap8P	(cap8P) capsular polysaccharide synthesis enzyme Cap8P [Capsule (VF0003)] [Staphylococus aureus subsp. aureus MW2]	NP_644954
chp	(chp) chemotaxis-inhibiting protein CHIPS [CHIPS (VF0424)] [Staphylococus aureus subsp. aureus str. Newman]	YP_001332911
clfA	(clfA) Clumping factor A fibrinogen-binding protein [Clumping factor (VF0004)] [Staphylococus aureus subsp. aureus MW2]	NP_645581
clfB	(clfB) Clumping factor B adhesin [Clumping factor (VF0004)] [Staphylococus aureus subsp. aureus MW2]	NP_647368
cna	(cna) collagen adhesin precursor [CNA (VF0005)] [Staphylococus aureus subsp. aureus MW2]	NP_647429
coa	(coa) staphylocoagulase precursor [Staphylocoagulase (VF0421)] [Staphylococus aureus subsp. aureus MW2]	NP_645021
cpsA	(cpsA) undecaprenyl diphosphate synthase [Capsule (VF0361)] [Enterococcus faecalis V583]	NP_816141
cpsB	(cpsB) phosphatidate cytidylyltransferase [Capsule (VF0361)] [Enterococcus faecalis V583]	NP_816140
cpsC	(cpsC) teichoic acid biosynthesis protein putative [Capsule (VF0361)] [Enterococcus faecalis V583]	NP_816139
cpsD	(cpsD) CpsD autokinase [Capsule (VF0274)] [Streptococcus agalactiae 2603 V/R]	NP_688181
cpsD	(cpsD) glycosyl transferase group 2 family protein [Capsule (VF0361)] [Enterococcus faecalis V583]	NP_816138
cpsE	(cpsE) glycosyl transferase group 2 family protein [Capsule (VF0361)] [Enterococcus faecalis V583]	NP_816137
cpsF	(cpsF) CpsF protein [Capsule (VF0361)] [Enterococcus faecalis V583]	NP_816136
cpsG	(cpsG) MurB family protein [Capsule (VF0361)] [Enterococcus faecalis V583]	NP_816135
cpsH	(cpsH) lipoprotein [Capsule (VF0361)] [Enterococcus faecalis V583]	NP_816134
cpsI	(cpsI) UDP-galactopyranose mutase [Capsule (VF0361)] [Enterococcus faecalis V583]	NP_816133
cpsJ	(cpsJ) ABC transporter ATP-binding protein [Capsule (VF0361)] [Enterococcus faecalis V583]	NP_816132
cpsK	(cpsK) ABC transporter permease protein [Capsule (VF0361)] [Enterococcus faecalis V583]	NP_816131
cylA	(cylA) cytolysin activator [Cytolysin (VF0356)] [Enterococcus faecalis str. MMH594]	AAM75253
cylB	(cylB) ABC-type transporter [Cytolysin (VF0356)] [Enterococcus faecalis str. MMH594]	AAM75252
cylI	(cylI) cytolysin immunity protein [Cytolysin (VF0356)] [Enterococcus faecalis str. MMH594]	AAM75254
cylL	(cylL) CylL; cytolysin subunit [Cytolysin (VF0356)] [Enterococcus faecalis str. MMH594]	AAM75249
cylM	(cylM) CylM; cytolysin subunit modifier [Cytolysin (VF0356)] [Enterococcus faecalis str. MMH594]	AAM75251
cylR1	(cylR1) cytolysin regulator R1 [Cytolysin (VF0356)] [Enterococcus faecalis str. MMH594]	AAM75248
cylR2	(cylR2) cytolysin regulator R2 [Cytolysin (VF0356)] [Enterococcus faecalis str. MMH594]	AAM75247
cylS	(cylS) CylS; cytolysin subunit [Cytolysin (VF0356)] [Enterococcus faecalis str. MMH594]	AAM75250
ebp	(ebp) cell surface elastin binding protein [EbpS (VF0008)] [Staphylococus aureus subsp. aureus MW2]	NP_646186
ebpA	(ebpA) endocarditis and biofilm-associated pilus tip protein EbpA [Ebp pili (VF0538)] [Enterococcus faecalis V583]	NP_814821
ebpB	(ebpB) endocarditis and biofilm-associated pilus minor subunit EbpB [Ebp pili (VF0538)] [Enterococcus faecalis V583]	NP_814822
ebpC	(ebpC) endocarditis and biofilm-associated pilus major subunit EbpC [Ebp pili (VF0538)] [Enterococcus faecalis V583]	NP_814823
efaA	(efaA) endocarditis specific antigen [EfaA (VF0354)] [Enterococcus faecalis V583]	NP_815739
esaA	(esaA) type VII secretion system protein EsaA [Type VII secretion system (VF0403)] [Staphylococus aureus subsp. aureus MW2]	NP_645074
esaB	(esaB) type VII secretion system protein EsaB [Type VII secretion system (VF0403)] [Staphylococus aureus subsp. aureus MW2]	NP_645076
esaC	(esaC) type VII secretion system protein secreted protein EsxC [Type VII secretion system (VF0403)] [Staphylococus aureus subsp. aureus MW2]	NP_645081
essA	(essA) type VII secretion system protein EssA monotopic membrane protein [Type VII secretion system (VF0403)] [Staphylococus aureus subsp. aureus MW2]	NP_645075
essB	(essB) type VII secretion system protein EssB monotopic membrane protein [Type VII secretion system (VF0403)] [Staphylococus aureus subsp. aureus MW2]	NP_645078
essC	(essC) type VII secretion system protein EssC FtsK/SpoIIIE family ATPase [Type VII secretion system (VF0403)] [Staphylococus aureus subsp. aureus MW2]	NP_645079
esxA	(esxA) type VII secretion system protein secreted protein EsxA [Type VII secretion system (VF0403)] [Staphylococus aureus subsp. aureus MW2]	NP_645073
esxB	(esxB) type VII secretion system protein secreted protein EsxB [Type VII secretion system (VF0403)] [Staphylococus aureus subsp. aureus MW2]	NP_645082
eta	(eta) exfoliative toxin A [Exfoliative toxin (VF0009)] [Staphylococus aureus ZM]	AAA17490
fbaA	(fbaA) protein F2 like fibronectin-binding protein [Fibronectin-binding proteins (CVF113)] [Streptococcus pyogenes M1 GAS]	NP_269969
fepC	(fepC) ferrienterobactin ABC transporter ATPase [Enterobactin (VF0228)] [Escherichia coli CFT073]	NP_752606
fimB	(fimB) Type 1 fimbriae Regulatory protein fimB [Type 1 fimbriae (VF0221)] [Escherichia coli CFT073]	NP_757239
fimC	(fimC) Chaperone protein fimC precursor [Type 1 fimbriae (VF0221)] [Escherichia coli CFT073]	NP_757243
fnbA	(fnbA) fibronectin-binding protein A [FnBPs (VF0010)] [Staphylococus aureus subsp. aureus MW2]	NP_647238
fnbB	(fnbB) fibronectin-binding protein B [FnBPs (VF0010)] [Staphylococus aureus subsp. aureus MW2]	NP_647237
fsrA	(fsrA) response regulator [Fsr (VF0360)] [Enterococcus faecalis V583]	NP_815519
fsrB	(fsrB) agrBfs protein [Fsr (VF0360)] [Enterococcus faecalis V583]	NP_815518
fsrC	(fsrC) histidine kinase putative [Fsr (VF0360)] [Enterococcus faecalis V583]	NP_815517
fss1	(fss1) Enterococcus faecalis surface protein Fss1 fibrinogen binding protein [Fibrinogen binding protein (AI271)] [Enterococcus faecalis V583]	NP_813892
fss2	(fss2) Enterococcus faecalis surface protein Fss2 fibrinogen binding protein [Fibrinogen binding protein (AI272)] [Enterococcus faecalis V583]	NP_816151
fss3	(fss3) Enterococcus faecalis surface protein Fss3 fibrinogen binding protein [Fibrinogen binding protein (AI273)] [Enterococcus faecalis V583]	NP_815578
geh	(geh) glycerol ester hydrolase [Lipase (VF0012)] [Staphylococus aureus subsp. aureus MW2]	NP_645114
gelE	(gelE) coccolysin [Gelatinase (VF0357)] [Enterococcus faecalis V583]	NP_815516
gspL	(gspL) general secretion pathway protein L [T2SS (VF0333)] [Shigella dysenteriae Sd197]	YP_404608
gspM	(gspM) general secretion pathway protein M [T2SS (VF0333)] [Shigella dysenteriae Sd197]	YP_404609
hasB	(hasB) UDP-glucose 6-dehydrogenase [Hyaluronic acid capsule (VF0244)] [Streptococcus pyogenes M1 GAS]	NP_270108
hasC	(hasC) UDP-glucose pyrophosphorylase [Hyaluronic acid capsule (VF0244)] [Streptococcus pyogenes M1 GAS]	NP_270109
hlb	(hlb) beta-hemolysin [<beta>-hemolysin (VF0002)] [Staphylococus aureus subsp. aureus COL]	YP_186826
hld	(hld) delta-hemolysin [<delta>-hemolysin (VF0007)] [Staphylococus aureus subsp. aureus MW2]	NP_646776
hlgA	(hlgA) gamma-hemolysin chain II precursor [<gamma>-hemolysin (VF0011)] [Staphylococus aureus subsp. aureus MW2]	NP_647159
hlgB	(hlgB) gamma-hemolysin component B [<gamma>-hemolysin (VF0011)] [Staphylococus aureus subsp. aureus MW2]	NP_647161
hlgC	(hlgC) gamma-hemolysin component C [<gamma>-hemolysin (VF0011)] [Staphylococus aureus subsp. aureus MW2]	NP_647160
hly/hla	(hly/hla) Alpha-Hemolysin precursor [<alpha>-hemolysin (VF0001)] [Staphylococus aureus subsp. aureus MW2]	NP_645861
hysA	(hysA) hyaluronate lyase precursor [Hyaluronate lyase (VF0013)] [Staphylococus aureus subsp. aureus MW2]	NP_646946
icaA	(icaA) N-acetylglucosaminyltransferase involved in polysaccharide intercellular adhesin(PIA) synthesis [Intercellular adhesion proteins (VF0014)] [Staphylococus aureus subsp. aureus MW2]	NP_647403
icaB	(icaB) N-deacetylase involved in polysaccharide intercellular adhesin(PIA) synthesis [Intercellular adhesion proteins (VF0014)] [Staphylococus aureus subsp. aureus MW2]	NP_647405
icaC	(icaC) intercellular adhesion protein C involved in polysaccharide intercellular adhesin(PIA) synthesis [Intercellular adhesion proteins (VF0014)] [Staphylococus aureus subsp. aureus MW2]	NP_647406
icaD	(icaD) intercellular adhesion protein D involved in polysaccharide intercellular adhesin(PIA) synthesis [Intercellular adhesion proteins (VF0014)] [Staphylococus aureus subsp. aureus MW2]	NP_647404
icaR	(icaR) ica operon transcriptional regulator IcaR [Intercellular adhesion proteins (VF0014)] [Staphylococus aureus subsp. aureus MW2]	NP_647402
isdA	(isdA) iron-regulated surface determinant protein A [Isd (VF0015)] [Staphylococus aureus subsp. aureus str. Newman]	YP_001332075
isdB	(isdB) iron-regulated surface determinant protein B hemoglobin receptor [Isd (VF0015)] [Staphylococus aureus subsp. aureus str. Newman]	YP_001332074
isdC	(isdC) iron-regulated surface determinant protein C [Isd (VF0015)] [Staphylococus aureus subsp. aureus str. Newman]	YP_001332076
isdD	(isdD) iron-regulated surface determinant protein D [Isd (VF0015)] [Staphylococus aureus subsp. aureus MW2]	NP_645831
isdE	(isdE) iron-regulated surface determinant protein E [Isd (VF0015)] [Staphylococus aureus subsp. aureus str. Newman]	YP_001332078
isdF	(isdF) iron-regulated surface determinant protein F ATP-binding-cassette-type transmembrane transporter [Isd (VF0015)] [Staphylococus aureus subsp. aureus MW2]	NP_645833
isdG	(isdG) iron-regulated surface determinant protein G [Isd (VF0015)] [Staphylococus aureus subsp. aureus str. Newman]	YP_001332081
lip	(lip) triacylglycerol lipase precursor [Lipase (CVF091)] [Staphylococus aureus subsp. aureus MW2]	NP_647407
lukF-PV	(lukF-PV) Panton-Valentine leukocidin chain F precursor [PVL (VF0018)] [Staphylococus aureus subsp. aureus MW2]	NP_646195
lukS-PV	(lukS-PV) Panton-Valentine leukocidin chain S precursor [PVL (VF0018)] [Staphylococus aureus subsp. aureus MW2]	NP_646196
map	(map) extracellular proteins Map [Eap/Map (VF0016)] [Staphylococus aureus str. Newman D2C (ATCC 25904)]	CAB94853
papB	(papB) regulatory protein PapB [P fimbriae (VF0220)] [Escherichia coli CFT073]
papI	(papI) regulatory protein PapI [P fimbriae (VF0220)] [Escherichia coli CFT073]	NP_755468
pcr1	(pcr1) type III secretion system protein Pcr1 [TTSS (VF0083)] [Pseudomonas aeruginosa PAO1]	NP_250390
prgB/asc10	(prgB/asc10) aggregation substance PrgB/Asc10 [AS (VF0352)] [Enterococcus faecalis V583]	NP_817031
sak	(sak) Staphylokinase precursor [Staphylokinase (VF0021)] [Staphylococus aureus subsp. aureus MW2]	NP_646702
sbi	(sbi) IgG-binding protein SBI [Sbi (VF0423)] [Staphylococus aureus subsp. aureus MW2]	NP_647158
scn	(scn) complement inhibitor SCIN [SCIN (VF0425)] [Staphylococus aureus subsp. aureus str. Newman]	YP_001332910
sdrC	(sdrC) Ser-Asp rich fibrinogen-binding bone sialoprotein-binding protein [SDr (VF0019)] [Staphylococus aureus subsp. aureus MW2]	NP_645333
sdrD	(sdrD) Ser-Asp rich fibrinogen-binding bone sialoprotein-binding protein [SDr (VF0019)] [Staphylococus aureus subsp. aureus MW2]	NP_645334
sdrE	(sdrE) Ser-Asp rich fibrinogen-binding bone sialoprotein-binding protein [SDr (VF0019)] [Staphylococus aureus subsp. aureus MW2]	NP_645335
sea	(sea) staphylococcal enterotoxin A precursor [SE (VF0020)] [Staphylococus aureus subsp. aureus MW2]	NP_646706
seb	(seb) staphylococcal enterotoxin B [SE (VF0020)] [Staphylococus aureus S6]	AAA88550
sec	(sec) staphylococcal enterotoxin C precursor [Enterotoxin C (CVF057)] [Staphylococus aureus subsp. aureus MW2]	NP_645576
sed	(sed) staphylococcal enterotoxin D precursor [SE (VF0020)] [Staphylococus aureus RN4220]	AAB06195
seh	(seh) staphylococcal enterotoxin H precursor [SE (VF0020)] [Staphylococus aureus subsp. aureus MW2]	NP_644866
selk	(selk) staphylococcal enterotoxin K precursor [SE (VF0020)] [Staphylococus aureus subsp. aureus MW2]	NP_646755
sell	(sell) staphylococcal enterotoxin L precursor [Enterotoxin-like L (CVF065)] [Staphylococus aureus subsp. aureus MW2]	NP_645577
selq	(selq) staphylococcal enterotoxin G precursor [SE (VF0020)] [Staphylococus aureus subsp. aureus MW2]	NP_646754
sgrA	(sgrA) cell wall anchored protein SgrA [SgrA (VF0540)] [Enterococcus faecium DO]	ZP_00602747
spa	(spa) Immunoglobulin G binding protein A precursor [SpA (VF0017)] [Staphylococus aureus subsp. aureus MW2]	NP_644899
spaA	(spaA) SpaA-type pili major subunit SpaA [Pili (VF0364)] [Corynebacterium diphtheriae NCTC 13129]	NP_940344
spaB	(spaB) SpaA-type pili minor subunit SpaB [Pili (VF0364)] [Corynebacterium diphtheriae NCTC 13129]	NP_940342
spaC	(spaC) SpaA-type pili minor subunit SpaC [Pili (VF0364)] [Corynebacterium diphtheriae NCTC 13129]	NP_940341
spaF	(spaF) SpaD-type pili minor subunit SpaF pilus tip protein [Pili (VF0364)] [Corynebacterium diphtheriae NCTC 13129]	NP_938629
spaG	(spaG) SpaH-type pili minorsubunit SpaG pilus tip protein [Pili (VF0364)] [Corynebacterium diphtheriae NCTC 13129]	NP_940534
spaH	(spaH) SpaH-type pili major subunit SpaH [Pili (VF0364)] [Corynebacterium diphtheriae NCTC 13129]	NP_940533
spaI	(spaI) SpaH-type pili minorsubunit SpaI [Pili (VF0364)] [Corynebacterium diphtheriae NCTC 13129]	NP_940530
spec	(spec) streptococcal exotoxin C precursor phage associated [Spes (VF0248)] [Streptococcus pyogenes M1 GAS]	NP_268943
sprE	(sprE) serine proteinase V8 family [SprE (VF0358)] [Enterococcus faecalis V583]	NP_815515
srtB	(srtB) NPQTN specific sortase B [Isd (VF0015)] [Staphylococus aureus subsp. aureus MW2]	NP_645834
srtC	(srtC) fimbrial associated sortase [SpaD-type pili (AI130)] [Corynebacterium diphtheriae NCTC 13129]	NP_938627
srtC	(srtC) sortase [Ebp pili (VF0538)] [Enterococcus faecalis V583]	NP_814824
srtD	(srtD) fimbrial associated sortase [SpaH-type pili (AI131)] [Corynebacterium diphtheriae NCTC 13129]	NP_940532
srtE	(srtE) fimbrial associated sortase [SpaH-type pili (AI131)] [Corynebacterium diphtheriae NCTC 13129]	NP_940531
srtG2	(srtG2) surface protein cell wall anchor sortase_B family [PI-2 (VF0530)] [Streptococcus pneumoniae Taiwan19F-14]	YP_002742502
sspA	(sspA) serine protease; V8 protease; glutamyl endopeptidase [V8 protease (VF0023)] [Staphylococus aureus subsp. aureus MW2]	NP_645749
sspB	(sspB) staphopain cysteine proteinase SspB [Staphopain (VF0006)] [Staphylococus aureus subsp. aureus MW2]	NP_645748
sspC	(sspC) Staphostatin B [Staphopain (VF0006)] [Staphylococus aureus subsp. aureus MW2]	NP_645747
tsst-1	(tsst-1) toxic shock syndrome toxin-1 [TSST-1 (VF0022)] [Staphylococus aureus subsp. aureus N315]	NP_375120
vWbp	(vWbp) secreted von Willebrand factor-binding protein precursor [vWbp (VF0420)] [Staphylococus aureus subsp. aureus str. Newman]	YP_001331791
ybtT	(ybtT) yersiniabactin biosynthetic protein YbtT [Yersiniabactin (VF0136)] [Yersinia pestis CO92]	NP_405469
ybtU	(ybtU) yersiniabactin biosynthetic protein YbtU [Yersiniabactin (VF0136)] [Yersinia pestis CO92]	NP_405470
