# Supplementary material for: Unraveling the Genomic Landscape of Staphylococcus aureus in Hospital Settings of East Africa
Source: Research Square preprint supplement (doi:10.21203/rs.3.rs-6846109/v1), 2025-08-07
Supplement: Supplementary file 4 [file f04f58ae33d74dbff673f5ad.xlsx]

## Sheet: Sheet1
Sample ID	species	ST-type	arcC	aroE	glpF	gmk	pta	tpi	yqiL	Origin
ERR12511686	saureus	8	3	3	1	1	4	4	3	Tanzania
ERR12511687	saureus	88	22	1	14	23	12	4	31	Tanzania
ERR12511688	saureus	15	13	13	1	1	12	11	13	Tanzania
ERR12511689	saureus	8	3	3	1	1	4	4	3	Tanzania
ERR12511690	saureus	789	3	4	1	4	4	6	3	Tanzania
ERR12511691	saureus	152	46	75	49	44	13	68	60	Tanzania
ERR12511692	saureus	152	46	75	49	44	13	68	60	Tanzania
ERR12511693	saureus	88	22	1	14	23	12	4	31	Tanzania
ERR12511694	saureus	Unique	46	75	49	44	13	68	60	Tanzania
ERR12511696	saureus	8	3	3	1	1	4	4	3	Tanzania
ERR12511697	saureus	152	46	75	49	44	13	68	60	Tanzania
ERR12511698	saureus	152	46	75	49	44	13	68	60	Tanzania
ERR12511699	saureus	15	13	13	1	1	12	11	13	Tanzania
ERR12511700	saureus	8	3	3	1	1	4	4	3	Tanzania
ERR12511701	saureus	8	3	3	1	1	4	4	3	Tanzania
ERR12511702	saureus	152	46	75	49	44	13	68	60	Tanzania
ERR12511703	saureus	152	46	75	49	44	13	68	60	Tanzania
ERR12511704	saureus	8	3	3	1	1	4	4	3	Tanzania
ERR12511705	saureus	8	3	3	1	1	4	4	3	Tanzania
ERR12511706	saureus	8	3	3	1	1	4	4	3	Tanzania
ERR12511707	saureus	8	3	3	1	1	4	4	3	Tanzania
ERR12511708	saureus	80	1	3	1	14	11	51	10	Tanzania
ERR12511709	saureus	152	46	75	49	44	13	68	60	Tanzania
ERR12511710	saureus	152	46	75	49	44	13	68	60	Tanzania
ERR12511711	saureus	601	3	37	48	19	49	26	39	Tanzania
ERR12511712	saureus	8	3	3	1	1	4	4	3	Tanzania
ERR12511713	saureus	Unique	1	372	1	8	355	4	3	Tanzania
ERR12511714	saureus	152	46	75	49	44	13	68	60	Tanzania
ERR12511715	saureus	152	46	75	49	44	13	68	60	Tanzania
ERR12511716	saureus	15	13	13	1	1	12	11	13	Tanzania
ERR12511717	saureus	8	3	3	1	1	4	4	3	Tanzania
ERR12511718	saureus	152	46	75	49	44	13	68	60	Tanzania
ERR12511719	saureus	152	46	75	49	44	13	68	60	Tanzania
ERR12511720	saureus	8	3	3	1	1	4	4	3	Tanzania
ERR12511721	saureus	15	13	13	1	1	12	11	13	Tanzania
ERR12511722	saureus	121	6	5	6	2	7	14	5	Tanzania
ERR12511723	saureus	8	3	3	1	1	4	4	3	Tanzania
ERR12511724	saureus	8	3	3	1	1	4	4	3	Tanzania
ERR12511725	saureus	152	46	75	49	44	13	68	60	Tanzania
ERR12511726	saureus	8	3	3	1	1	4	4	3	Tanzania
ERR12511727	saureus	8	3	3	1	1	4	4	3	Tanzania
ERR12511728	saureus	Unique	46	75	49	44	33	68	60	Tanzania
ERR12511729	saureus	152	46	75	49	44	13	68	60	Tanzania
ERR12511730	saureus	152	46	75	49	44	13	68	60	Tanzania
ERR12511731	saureus	8	3	3	1	1	4	4	3	Tanzania
ERR12511732	saureus	152	46	75	49	44	13	68	60	Tanzania
ERR12511733	saureus	8	3	3	1	1	4	4	3	Tanzania
ERR12511734	saureus	8	3	3	1	1	4	4	3	Tanzania
ERR12511735	saureus	8	3	3	1	1	4	4	3	Tanzania
ERR12511736	saureus	8	3	3	1	1	4	4	3	Tanzania
ERR12511737	saureus	1	1	1	1	1	1	1	1	Tanzania
ERR12511738	saureus	8	3	3	1	1	4	4	3	Tanzania
ERR12511739	saureus	152	46	75	49	44	13	68	60	Tanzania
ERR12511740	saureus	8	3	3	1	1	4	4	3	Tanzania
ERR12511741	saureus	Unique	3	3	1	1	100	4	3	Tanzania
ERR12511742	saureus	789	3	4	1	4	4	6	3	Tanzania
ERR12511743	saureus	8	3	3	1	1	4	4	3	Tanzania
ERR12511744	saureus	8	3	3	1	1	4	4	3	Tanzania
ERR12511745	saureus	8	3	3	1	1	4	4	3	Tanzania
ERR12511746	saureus	8	3	3	1	1	4	4	3	Tanzania
ERR12511747	saureus	789	3	4	1	4	4	6	3	Tanzania
ERR12511748	saureus	8	3	3	1	1	4	4	3	Tanzania
ERR12511749	saureus	Unique	46	75	49	615	13	863	788	Tanzania
ERR12511750	saureus	8	3	3	1	1	4	4	3	Tanzania
ERR12511751	saureus	8	3	3	1	1	4	4	3	Tanzania
ERR12511752	saureus	8	3	3	1	1	4	4	3	Tanzania
ERR12511753	saureus	152	46	75	49	44	13	68	60	Tanzania
ERR12511754	saureus	8	3	3	1	1	4	4	3	Tanzania
ERR12511755	saureus	8	3	3	1	1	4	4	3	Tanzania
ERR12511756	saureus	2744	10	393	6	2	260	58	2	Tanzania
ERR12511757	saureus	8	3	3	1	1	4	4	3	Tanzania
ERR12511758	saureus	8	3	3	1	1	4	4	3	Tanzania
ERR12511759	saureus	Unique	12	4	880	4	12	1	3	Tanzania
ERR12511760	saureus	8	3	3	1	1	4	4	3	Tanzania
ERR12511761	saureus	8	3	3	1	1	4	4	3	Tanzania
ERR12511762	saureus	152	46	75	49	44	13	68	60	Tanzania
ERR12511763	saureus	72	1	4	1	8	4	4	3	Tanzania
ERR12511764	saureus	3118	1	4	1	8	355	4	3	Tanzania
ERR12511765	saureus	152	46	75	49	44	13	68	60	Tanzania
ERR12511766	saureus	8	3	3	1	1	4	4	3	Tanzania
ERR12511767	saureus	8	3	3	1	1	4	4	3	Tanzania
ERR12511768	saureus	8	3	3	1	1	4	4	3	Tanzania
ERR12511769	saureus	Unique	46	75	49	44	13	68	60	Tanzania
ERR12511770	saureus	2430	6	5	6	98	7	14	5	Tanzania
ERR12511771	saureus	88	22	1	14	23	12	4	31	Tanzania
ERR12511772	saureus	8	3	3	1	1	4	4	3	Tanzania
ERR12511773	saureus	152	46	75	49	44	13	68	60	Tanzania
ERR12511774	saureus	121	6	5	6	2	7	14	5	Tanzania
ERR12511775	saureus	121	6	5	6	2	7	14	5	Tanzania
ERR12511776	saureus	8	3	3	1	1	4	4	3	Tanzania
ERR12511777	saureus	152	46	75	49	44	13	68	60	Tanzania
ERR12511778	saureus	8	3	3	1	1	4	4	3	Tanzania
ERR12511779	saureus	8	3	3	1	1	4	4	3	Tanzania
ERR12511780	saureus	121	6	5	6	2	7	14	5	Tanzania
ERR12511781	saureus	152	46	75	49	44	13	68	60	Tanzania
ERR12511782	saureus	8	3	3	1	1	4	4	3	Tanzania
ERR12511783	saureus	152	46	75	49	44	13	68	60	Tanzania
ERR12511784	saureus	152	46	75	49	44	13	68	60	Tanzania
ERR12511785	saureus	Unique	3	3	1	1	100	4	3	Tanzania
ERR12511786	saureus	8	3	3	1	1	4	4	3	Tanzania
ERR12511787	saureus	8	3	3	1	1	4	4	3	Tanzania
ERR12511788	saureus	8	3	3	1	1	4	4	3	Tanzania
ERR12511789	saureus	Unique	904	4	359	618	4	6	1038	Tanzania
ERR12511790	saureus	8	3	3	1	1	4	4	3	Tanzania
ERR12511791	saureus	152	46	75	49	44	13	68	60	Tanzania
ERR12511792	saureus	8	3	3	1	1	4	4	3	Tanzania
ERR12511793	saureus	8	3	3	1	1	4	4	3	Tanzania
ERR12511794	saureus	789	3	4	1	4	4	6	3	Tanzania
ERR12511795	saureus	152	46	75	49	44	13	68	60	Tanzania
ERR12511796	saureus	8	3	3	1	1	4	4	3	Tanzania
ERR12511797	saureus	8	3	3	1	1	4	4	3	Tanzania
ERR12511798	saureus	152	46	75	49	44	13	68	60	Tanzania
ERR12511799	saureus	Unique	22	1	14	23	12	4	747	Tanzania
ERR12511800	saureus	Unique	557	13	962	1	12	870	13	Tanzania
ERR12511801	saureus	80	1	3	1	14	11	51	10	Tanzania
ERR12511802	saureus	152	46	75	49	44	13	68	60	Tanzania
ERR12511803	saureus	8	3	3	1	1	4	4	3	Tanzania
ERR12511804	saureus	152	46	75	49	44	13	68	60	Tanzania
ERR12511805	saureus	152	46	75	49	44	13	68	60	Tanzania
ERR12511806	saureus	Unique	1	4	736	4	12	1	10	Tanzania
ERR12511807	saureus	8	3	3	1	1	4	4	3	Tanzania
ERR12511808	saureus	8	3	3	1	1	4	4	3	Tanzania
ERR12511809	saureus	8	3	3	1	1	4	4	3	Tanzania
ERR12511810	saureus	Unique	6	5	6	2	7	14	5	Tanzania
ERR12511811	saureus	152	46	75	49	44	13	68	60	Tanzania
ERR12511812	saureus	152	46	75	49	44	13	68	60	Tanzania
ERR12511813	saureus	Unique	3	3	1	1	4	4	1002	Tanzania
ERR12511814	saureus	121	6	5	6	2	7	14	5	Tanzania
ERR12511815	saureus	88	22	1	14	23	12	4	31	Tanzania
ERR12511816	saureus	121	6	5	6	2	7	14	5	Tanzania
ERR12511817	saureus	30	2	2	2	2	6	3	2	Tanzania
ERR12511818	saureus	8	3	3	1	1	4	4	3	Tanzania
ERR12511819	saureus	15	13	13	1	1	12	11	13	Tanzania
ERR12511820	saureus	88	22	1	14	23	12	4	31	Tanzania
ERR12511821	saureus	8	3	3	1	1	4	4	3	Tanzania
ERR12511822	saureus	88	22	1	14	23	12	4	31	Tanzania
ERR12511823	saureus	88	22	1	14	23	12	4	31	Tanzania
ERR12511824	saureus	6	12	4	1	4	12	1	3	Tanzania
ERR12511825	saureus	121	6	5	6	2	7	14	5	Tanzania
ERR12511826	saureus	8	3	3	1	1	4	4	3	Tanzania
ERR12511827	saureus	22	7	6	1	5	8	8	6	Tanzania
ERR12511828	saureus	121	6	5	6	2	7	14	5	Tanzania
ERR12511829	saureus	6	12	4	1	4	12	1	3	Tanzania
ERR12511830	saureus	8	3	3	1	1	4	4	3	Tanzania
ERR12511831	saureus	88	22	1	14	23	12	4	31	Tanzania
ERR12511832	saureus	3118	1	4	1	8	355	4	3	Tanzania
ERR12511833	saureus	152	46	75	49	44	13	68	60	Tanzania
ERR12511834	saureus	88	22	1	14	23	12	4	31	Tanzania
ERR12511835	saureus	88	22	1	14	23	12	4	31	Tanzania
ERR12511836	saureus	8	3	3	1	1	4	4	3	Tanzania
ERR12511837	saureus	88	22	1	14	23	12	4	31	Tanzania
ERR12511838	saureus	8	3	3	1	1	4	4	3	Tanzania
ERR12511839	saureus	1153	1	13	1	1	124	5	3	Tanzania
ERR12511840	saureus	8	3	3	1	1	4	4	3	Tanzania
ERR12511841	saureus	Unique	22	1	14	23	937	4	31	Tanzania
ERR12511842	saureus	Unique	3	3	1	1	4	4	1038	Tanzania
ERR12511843	saureus	15	13	13	1	1	12	11	13	Tanzania
ERR12511844	saureus	88	22	1	14	23	12	4	31	Tanzania
ERR12511845	saureus	8	3	3	1	1	4	4	3	Tanzania
ERR12511846	saureus	8	3	3	1	1	4	4	3	Tanzania
ERR12511847	saureus	88	22	1	14	23	12	4	31	Tanzania
ERR12511848	saureus	121	6	5	6	2	7	14	5	Tanzania
ERR12511849	saureus	6	12	4	1	4	12	1	3	Tanzania
ERR12511850	saureus	121	6	5	6	2	7	14	5	Tanzania
ERR12916291	saureus	8	3	3	1	1	4	4	3	Tanzania
ERR12916292	saureus	8	3	3	1	1	4	4	3	Tanzania
ERR12916293	saureus	5	1	4	1	4	12	1	10	Tanzania
ERR12916294	saureus	152	46	75	49	44	13	68	60	Tanzania
ERR12916295	saureus	8	3	3	1	1	4	4	3	Tanzania
ERR12916296	saureus	152	46	75	49	44	13	68	60	Tanzania
ERR12916297	saureus	6	12	4	1	4	12	1	3	Tanzania
ERR12916298	saureus	8	3	3	1	1	4	4	3	Tanzania
ERR12916299	saureus	8	3	3	1	1	4	4	3	Tanzania
ERR12916300	saureus	15	13	13	1	1	12	11	13	Tanzania
ERR1764887	saureus	Unique	201	256	236	66	194	219	204	Kenya
ERR1764889	saureus	30	2	2	2	2	6	3	2	Kenya
ERR1764890	saureus	30	2	2	2	2	6	3	2	Kenya
ERR1764892	saureus	30	2	2	2	2	6	3	2	Kenya
ERR1764893	saureus	1290	1	4	1	1	11	1	3	Kenya
ERR1764895	saureus	30	2	2	2	2	6	3	2	Kenya
ERR1764896	saureus	152	46	75	49	44	13	68	60	Kenya
ERR1764897	saureus	152	46	75	49	44	13	68	60	Kenya
ERR1764898	saureus	Unique	201	256	236	66	82	219	962	Kenya
ERR1764899	saureus	Unique	201	256	236	66	82	219	962	Kenya
ERR1764901	saureus	152	46	75	49	44	13	68	60	Kenya
ERR1764903	saureus	22	7	6	1	5	8	8	6	Kenya
ERR1764904	saureus	5	1	4	1	4	12	1	10	Kenya
ERR1764905	saureus	8	3	3	1	1	4	4	3	Kenya
ERR1764906	saureus	188	3	1	1	8	1	1	1	Kenya
ERR1764907	saureus	188	3	1	1	8	1	1	1	Kenya
ERR1764908	saureus	152	46	75	49	44	13	68	60	Kenya
ERR1764909	saureus	152	46	75	49	44	13	68	60	Kenya
ERR1764910	saureus	152	46	75	49	44	13	68	60	Kenya
ERR1764911	saureus	7635	2	3	936	1	4	4	30	Kenya
ERR1764912	saureus	152	46	75	49	44	13	68	60	Kenya
ERR1764915	saureus	80	1	3	1	14	11	51	10	Kenya
ERR1764916	saureus	580	3	35	48	19	20	26	39	Kenya
ERR1764917	saureus	152	46	75	49	44	13	68	60	Kenya
ERR1764918	saureus	580	3	35	48	19	20	26	39	Kenya
ERR1764919	saureus	22	7	6	1	5	8	8	6	Kenya
ERR1764920	saureus	140	43	37	48	19	49	26	39	Kenya
ERR1764921	saureus	80	1	3	1	14	11	51	10	Kenya
ERR1764922	saureus	508	10	40	8	6	10	3	2	Kenya
ERR1764923	saureus	8	3	3	1	1	4	4	3	Kenya
ERR1764924	saureus	8	3	3	1	1	4	4	3	Kenya
ERR1764925	saureus	8	3	3	1	1	4	4	3	Kenya
ERR1764926	saureus	80	1	3	1	14	11	51	10	Kenya
ERR1764927	saureus	22	7	6	1	5	8	8	6	Kenya
ERR1764928	saureus	152	46	75	49	44	13	68	60	Kenya
ERR1764929	saureus	22	7	6	1	5	8	8	6	Kenya
ERR1764930	saureus	188	3	1	1	8	1	1	1	Kenya
ERR1764931	saureus	152	46	75	49	44	13	68	60	Kenya
ERR1764932	saureus	80	1	3	1	14	11	51	10	Kenya
ERR1764933	saureus	8	3	3	1	1	4	4	3	Kenya
ERR1764934	saureus	8	3	3	1	1	4	4	3	Kenya
ERR1764935	saureus	72	1	4	1	8	4	4	3	Kenya
ERR1764936	saureus	Unique	201	640	358	66	221	82	752	Kenya
ERR1764937	saureus	Unique	22	1	58	23	12	4	31	Kenya
ERR1764938	saureus	25	4	1	4	1	5	5	4	Kenya
ERR1764939	saureus	Unique	1	4	769	1	11	1	3	Kenya
ERR1764940	saureus	152	46	75	49	44	13	68	60	Kenya
ERR1764941	saureus	152	46	75	49	44	13	68	60	Kenya
ERR1764942	saureus	8	3	3	1	1	4	4	3	Kenya
ERR1764943	saureus	80	1	3	1	14	11	51	10	Kenya
ERR1764944	saureus	8	3	3	1	1	4	4	3	Kenya
ERR1764945	saureus	2430	6	5	6	98	7	14	5	Kenya
ERR1764946	saureus	8	3	3	1	1	4	4	3	Kenya
ERR1764947	saureus	80	1	3	1	14	11	51	10	Kenya
ERR1764948	saureus	8	3	3	1	1	4	4	3	Kenya
ERR1764949	saureus	1633	46	75	212	44	13	68	60	Kenya
ERR1764950	saureus	97	3	1	1	1	1	5	3	Kenya
ERR1764951	saureus	72	1	4	1	8	4	4	3	Kenya
ERR1764952	saureus	707	18	71	6	2	7	58	2	Kenya
ERR1764953	saureus	30	2	2	2	2	6	3	2	Kenya
ERR1764954	saureus	15	13	13	1	1	12	11	13	Kenya
ERR1764955	saureus	1290	1	4	1	1	11	1	3	Kenya
ERR1764956	saureus	152	46	75	49	44	13	68	60	Kenya
ERR1764957	saureus	8	3	3	1	1	4	4	3	Kenya
ERR1764958	saureus	152	46	75	49	44	13	68	60	Kenya
ERR1764959	saureus	707	18	71	6	2	7	58	2	Kenya
ERR1764960	saureus	80	1	3	1	14	11	51	10	Kenya
ERR1764961	saureus	72	1	4	1	8	4	4	3	Kenya
ERR1764962	saureus	Unique	1	4	769	1	11	1	3	Kenya
ERR1764963	saureus	22	7	6	1	5	8	8	6	Kenya
ERR1764964	saureus	Unique	10	40	8	6	10	3	211	Kenya
ERR1764965	saureus	30	2	2	2	2	6	3	2	Kenya
ERR1764967	saureus	8	3	3	1	1	4	4	3	Kenya
ERR1764968	saureus	72	1	4	1	8	4	4	3	Kenya
ERR1764969	saureus	88	22	1	14	23	12	4	31	Kenya
ERR1764970	saureus	573	1	1	1	1	12	1	1	Kenya
ERR1764971	saureus	8	3	3	1	1	4	4	3	Kenya
ERR1764972	saureus	508	10	40	8	6	10	3	2	Kenya
ERR1764973	saureus	1633	46	75	212	44	13	68	60	Kenya
ERR1764974	saureus	152	46	75	49	44	13	68	60	Kenya
ERR1764975	saureus	8	3	3	1	1	4	4	3	Kenya
ERR1764976	saureus	152	46	75	49	44	13	68	60	Kenya
ERR1764977	saureus	152	46	75	49	44	13	68	60	Kenya
ERR1764978	saureus	Unique	3	38	760	1	1	1	338	Kenya
ERR1764979	saureus	152	46	75	49	44	13	68	60	Kenya
ERR1764980	saureus	152	46	75	49	44	13	68	60	Kenya
ERR1764981	saureus	152	46	75	49	44	13	68	60	Kenya
ERR1764982	saureus	152	46	75	49	44	13	68	60	Kenya
ERR1764983	saureus	72	1	4	1	8	4	4	3	Kenya
ERR1764984	saureus	152	46	75	49	44	13	68	60	Kenya
ERR1764985	saureus	188	3	1	1	8	1	1	1	Kenya
ERR1764986	saureus	80	1	3	1	14	11	51	10	Kenya
ERR1764987	saureus	152	46	75	49	44	13	68	60	Kenya
ERR1764988	saureus	1	1	1	1	1	1	1	1	Kenya
ERR1764989	saureus	8	3	3	1	1	4	4	3	Kenya
ERR1764990	saureus	1	1	1	1	1	1	1	1	Kenya
ERR1764991	saureus	152	46	75	49	44	13	68	60	Kenya
ERR1764992	saureus	8	3	3	1	1	4	4	3	Kenya
ERR1764993	saureus	8	3	3	1	1	4	4	3	Kenya
ERR1764994	saureus	152	46	75	49	44	13	68	60	Kenya
ERR1764995	saureus	152	46	75	49	44	13	68	60	Kenya
ERR1764996	saureus	72	1	4	1	8	4	4	3	Kenya
ERR1764997	saureus	Unique	3	3	1	1	4	4	3	Kenya
ERR1764998	saureus	152	46	75	49	44	13	68	60	Kenya
ERR1764999	saureus	152	46	75	49	44	13	68	60	Kenya
ERR1765000	saureus	80	1	3	1	14	11	51	10	Kenya
ERR1765001	saureus	8	3	3	1	1	4	4	3	Kenya
ERR1765002	saureus	152	46	75	49	44	13	68	60	Kenya
ERR1765004	saureus	15	13	13	1	1	12	11	13	Kenya
ERR1765005	saureus	2126	13	13	1	1	12	112	13	Kenya
ERR1765006	saureus	80	1	3	1	14	11	51	10	Kenya
ERR1765007	saureus	30	2	2	2	2	6	3	2	Kenya
ERR1765008	saureus	25	4	1	4	1	5	5	4	Kenya
ERR1765009	saureus	88	22	1	14	23	12	4	31	Kenya
ERR1765010	saureus	5	1	4	1	4	12	1	10	Kenya
ERR1765011	saureus	152	46	75	49	44	13	68	60	Kenya
ERR1765012	saureus	72	1	4	1	8	4	4	3	Kenya
ERR1765013	saureus	152	46	75	49	44	13	68	60	Kenya
ERR1765014	saureus	8	3	3	1	1	4	4	3	Kenya
ERR1765015	saureus	152	46	75	49	44	13	68	60	Kenya
ERR1765016	saureus	25	4	1	4	1	5	5	4	Kenya
ERR1765017	saureus	152	46	75	49	44	13	68	60	Kenya
ERR1765018	saureus	8	3	3	1	1	4	4	3	Kenya
ERR1765019	saureus	152	46	75	49	44	13	68	60	Kenya
ERR1765020	saureus	152	46	75	49	44	13	68	60	Kenya
ERR1765021	saureus	72	1	4	1	8	4	4	3	Kenya
ERR1765022	saureus	1633	46	75	212	44	13	68	60	Kenya
ERR1765023	saureus	152	46	75	49	44	13	68	60	Kenya
ERR1765024	saureus	6	12	4	1	4	12	1	3	Kenya
ERR1765025	saureus	8	3	3	1	1	4	4	3	Kenya
ERR1765026	saureus	6	12	4	1	4	12	1	3	Kenya
ERR1765027	saureus	88	22	1	14	23	12	4	31	Kenya
ERR1765028	saureus	152	46	75	49	44	13	68	60	Kenya
ERR1765029	saureus	22	7	6	1	5	8	8	6	Kenya
ERR1765030	saureus	5	1	4	1	4	12	1	10	Kenya
ERR1765031	saureus	88	22	1	14	23	12	4	31	Kenya
ERR1765032	saureus	8	3	3	1	1	4	4	3	Kenya
ERR1765033	saureus	22	7	6	1	5	8	8	6	Kenya
ERR1765034	saureus	152	46	75	49	44	13	68	60	Kenya
ERR1765035	saureus	72	1	4	1	8	4	4	3	Kenya
ERR1765036	saureus	Unique	3	3	1	1	4	4	3	Kenya
ERR1765037	saureus	152	46	75	49	44	13	68	60	Kenya
ERR1765038	saureus	30	2	2	2	2	6	3	2	Kenya
ERR1765039	saureus	152	46	75	49	44	13	68	60	Kenya
ERR1765040	saureus	88	22	1	14	23	12	4	31	Kenya
ERR1765041	saureus	152	46	75	49	44	13	68	60	Kenya
ERR1765042	saureus	152	46	75	49	44	13	68	60	Kenya
ERR1765043	saureus	152	46	75	49	44	13	68	60	Kenya
ERR1765044	saureus	5	1	4	1	4	12	1	10	Kenya
ERR1765045	saureus	573	1	1	1	1	12	1	1	Kenya
ERR1765046	saureus	25	4	1	4	1	5	5	4	Kenya
ERR1765047	saureus	152	46	75	49	44	13	68	60	Kenya
ERR1765048	saureus	88	22	1	14	23	12	4	31	Kenya
ERR1765049	saureus	1	1	1	1	1	1	1	1	Kenya
ERR1765050	saureus	1	1	1	1	1	1	1	1	Kenya
ERR1765051	saureus	Unique	10	40	8	6	10	3	211	Kenya
ERR1765052	saureus	101	3	1	14	15	11	19	3	Kenya
ERR1791869	saureus	Unique	201	256	236	66	194	219	204	Kenya
ERR1791870	saureus	1633	46	75	212	44	13	68	60	Kenya
ERR1791871	saureus	25	4	1	4	1	5	5	4	Kenya
ERR1791872	saureus	Unique	10	40	8	6	10	3	211	Kenya
ERR1791873	saureus	152	46	75	49	44	13	68	60	Kenya
ERR1791874	saureus	152	46	75	49	44	13	68	60	Kenya
ERR1791875	saureus	152	46	75	49	44	13	68	60	Kenya
ERR1791876	saureus	1633	46	75	212	44	13	68	60	Kenya
ERR1791877	saureus	72	1	4	1	8	4	4	3	Kenya
ERR1791878	saureus	152	46	75	49	44	13	68	60	Kenya
ERR1791879	saureus	Unique	281	3	1	1	4	4	3	Kenya
ERR1791880	saureus	152	46	75	49	44	13	68	60	Kenya
ERR1791881	saureus	88	22	1	14	23	12	4	31	Kenya
ERR1791882	saureus	152	46	75	49	44	13	68	60	Kenya
ERR3150909	saureus	6	12	4	1	4	12	1	3	Kenya
ERR3150910	saureus	6	12	4	1	4	12	1	3	Kenya
ERR3150911	saureus	580	3	35	48	19	20	26	39	Kenya
ERR3150912	saureus	25	4	1	4	1	5	5	4	Kenya
ERR3150914	saureus	Unique	908	1066	49	66	NA	68	906	Kenya
ERR3150916	saureus	Unique	8	964	1	618	922	871	11	Kenya
ERR3150919	saureus	Unique	46	75	759	44	13	68	750	Kenya
ERR3150922	saureus	Unique	7	6	904	5	8	8	6	Kenya
ERR3150924	saureus	Unique	12	123	1	1	12	11	11	Kenya
ERR3150925	saureus	789	3	4	1	4	4	6	3	Kenya
ERR3150927	saureus	1290	1	4	1	1	11	1	3	Kenya
ERR3150928	saureus	6	12	4	1	4	12	1	3	Kenya
ERR3150931	saureus	25	4	1	4	1	5	5	4	Kenya
ERR3150932	saureus	25	4	1	4	1	5	5	4	Kenya
ERR3150935	saureus	80	1	3	1	14	11	51	10	Kenya
ERR3150936	saureus	80	1	3	1	14	11	51	10	Kenya
ERR3150938	saureus	Unique	908	1087	NA	609	5	843	11	Kenya
ERR3150940	saureus	15	13	13	1	1	12	11	13	Kenya
ERR3150942	saureus	20	4	9	1	8	1	10	8	Kenya
ERR3150944	saureus	188	3	1	1	8	1	1	1	Kenya
ERR3150945	saureus	580	3	35	48	19	20	26	39	Kenya
ERR3150946	saureus	15	13	13	1	1	12	11	13	Kenya
ERR3150947	saureus	152	46	75	49	44	13	68	60	Kenya
ERR3150948	saureus	188	3	1	1	8	1	1	1	Kenya
ERR3150951	saureus	152	46	75	49	44	13	68	60	Kenya
ERR3150952	saureus	398	3	35	19	2	20	26	39	Kenya
ERR3150953	saureus	97	3	1	1	1	1	5	3	Kenya
ERR3150954	saureus	152	46	75	49	44	13	68	60	Kenya
ERR3150960	saureus	188	3	1	1	8	1	1	1	Kenya
ERR3150961	saureus	Unique	3	853	1	8	1	1	1	Kenya
ERR3150963	saureus	188	3	1	1	8	1	1	1	Kenya
ERR3150964	saureus	22	7	6	1	5	8	8	6	Kenya
ERR3150967	saureus	80	1	3	1	14	11	51	10	Kenya
ERR3150968	saureus	22	7	6	1	5	8	8	6	Kenya
ERR3150970	saureus	15	13	13	1	1	12	11	13	Kenya
ERR3150971	saureus	789	3	4	1	4	4	6	3	Kenya
ERR3150973	saureus	580	3	35	48	19	20	26	39	Kenya
ERR3150974	saureus	188	3	1	1	8	1	1	1	Kenya
ERR3150979	saureus	Unique	3	35	19	617	933	220	1037	Kenya
ERR3150980	saureus	Unique	3	1087	1	8	1	1	1	Kenya
ERR3150981	saureus	Unique	3	68	966	594	1	220	1	Kenya
ERR3150986	saureus	188	3	1	1	8	1	1	1	Kenya
ERR3150989	saureus	188	3	1	1	8	1	1	1	Kenya
ERR3150990	saureus	Unique	7	6	1	5	8	8	31	Kenya
ERR3150991	saureus	8	3	3	1	1	4	4	3	Kenya
ERR3150992	saureus	789	3	4	1	4	4	6	3	Kenya
ERR3150995	saureus	188	3	1	1	8	1	1	1	Kenya
ERR3150997	saureus	152	46	75	49	44	13	68	60	Kenya
ERR3150998	saureus	580	3	35	48	19	20	26	39	Kenya
ERR3151000	saureus	Unique	7	6	1	5	8	233	8	Kenya
ERR3151001	saureus	22	7	6	1	5	8	8	6	Kenya
ERR4692235	saureus	8	3	3	1	1	4	4	3	Uganda
ERR4692236	saureus	152	46	75	49	44	13	68	60	Uganda
ERR4692237	saureus	Unique	46	2	2	167	6	802	2	Uganda
ERR4692238	saureus	Unique	354	256	236	66	82	219	937	Uganda
ERR4692239	saureus	152	46	75	49	44	13	68	60	Uganda
ERR4692240	saureus	2178	2	2	2	167	6	3	2	Uganda
ERR4692241	saureus	1633	46	75	212	44	13	68	60	Uganda
ERR4692242	saureus	8	3	3	1	1	4	4	3	Uganda
ERR4692243	saureus	Unique	752	969	48	19	49	4	39	Uganda
ERR4692244	saureus	Unique	46	75	49	44	13	68	60	Uganda
ERR4692245	saureus	152	46	75	49	44	13	68	60	Uganda
ERR4692246	saureus	152	46	75	49	44	13	68	60	Uganda
ERR4692247	saureus	2019	3	292	267	66	221	82	226	Uganda
ERR4692248	saureus	1633	46	75	212	44	13	68	60	Uganda
ERR4692249	saureus	1633	46	75	212	44	13	68	60	Uganda
ERR4692250	saureus	1633	46	75	212	44	13	68	60	Uganda
ERR4692251	saureus	25	4	1	4	1	5	5	4	Uganda
ERR4692252	saureus	Unique	201	256	298	66	82	219	962	Uganda
ERR4692253	saureus	Unique	46	75	49	44	13	68	60	Uganda
ERR4692254	saureus	1633	46	75	212	44	13	68	60	Uganda
ERR4692255	saureus	Unique	10	40	918	6	10	3	2	Uganda
ERR4692256	saureus	152	46	75	49	44	13	68	60	Uganda
ERR4692257	saureus	5	1	4	1	4	12	1	10	Uganda
ERR4692259	saureus	7635	2	3	936	1	4	4	30	Uganda
ERR4692260	saureus	Unique	46	75	49	44	13	68	60	Uganda
ERR4692261	saureus	1	1	1	1	1	1	1	1	Uganda
ERR4692262	saureus	152	46	75	49	44	13	68	60	Uganda
ERR4692263	saureus	8	3	3	1	1	4	4	3	Uganda
ERR4692264	saureus	152	46	75	49	44	13	68	60	Uganda
ERR4692265	saureus	Unique	6	39	6	98	7	14	240	Uganda
ERR4692266	saureus	152	46	75	49	44	13	68	60	Uganda
ERR4692267	saureus	1633	46	75	212	44	13	68	60	Uganda
ERR4692268	saureus	Unique	3	75	49	66	221	233	240	Uganda
ERR4692269	saureus	8	3	3	1	1	4	4	3	Uganda
ERR4692270	saureus	1633	46	75	212	44	13	68	60	Uganda
ERR4692271	saureus	152	46	75	49	44	13	68	60	Uganda
ERR4692273	saureus	1	1	1	1	1	1	1	1	Uganda
ERR4692276	saureus	Unique	1	4	1	4	12	1	68	Uganda
